# Supplementary material
Source: PubMed Central journal article supplement (PMC6161062)
Supplement: oc8b00419_si_001.pdf [file oc8b00419_si_001.pdf]

## Supporting Information

# **A Universal Descriptor for the Entropy of Adsorbed Molecules in Confined Spaces**

Paul J. Dauenhauer<sup>1,2</sup>, Omar A. Abdelrahman<sup>2,3,\*</sup>

1. University of Minnesota, 484 Amundson Hall, 421 Washington Ave. SE, Minneapolis, MN 55455
2. Catalysis Center for Energy Innovation, 150 Academy Street, Colburn Laboratory, Newark, DE 19716
3. University of Massachusetts Amherst, 686 North Pleasant Street, 112F Goessmann Laboratory, Amherst, MA 01003

\*Corresponding Author: [abdel@umass.edu](mailto:abdel@umass.edu)

Keywords: Entropy, MOFs, Zeolites, Adsorption, Nanotubes

Total number of pages: 14

Total number of figures: 4

Total number of tables: 12

**Table S1-A. Gas phase entropy and adsorption entropy of hydrocarbons in FAU**

| Entry | Adsorbate       | Si/Al | $-\Delta S_{\text{ads}}^{\circ}/R$ | $S_{\text{gas}}^{\circ}/R$ | method <sup>a</sup> | ref. |
|-------|-----------------|-------|------------------------------------|----------------------------|---------------------|------|
| 1     | Propane         | 300   | 5.7                                | 32.5                       | Grav/cal            | 1    |
| 2     | Butane          | 3     | 9.9                                | 37.3                       | Grav/cal            | 2    |
| 3     | Butane          | 300   | 8.1                                | 37.3                       | Grav/cal            | 1    |
| 4     | 2-methylpropane | 300   | 7.6                                | 30.0                       | Grav/cal            | 1    |
| 5     | Pentane         | 30    | 9.0                                | 41.8                       | IGC                 | 3    |
| 6     | Pentane         | 13    | 8.1                                | 41.8                       | IGC                 | 3    |
| 7     | Pentane         | 3     | 8.2                                | 41.8                       | IGC                 | 3    |
| 8     | Pentane         | 3     | 10.5                               | 41.8                       | Grav/cal            | 2    |
| 9     | Pentane         | 300   | 10.8                               | 41.8                       | Grav/cal            | 1    |
| 10    | 2-methylbutane  | 300   | 10.0                               | 41.4                       | Grav/cal            | 1    |
| 11    | Hexane          | 30    | 9.5                                | 46.8                       | IGC                 | 3    |
| 12    | Hexane          | 13    | 8.8                                | 46.8                       | IGC                 | 3    |
| 13    | Hexane          | 3     | 8.6                                | 46.8                       | IGC                 | 3    |
| 14    | Hexane          | 3     | 11.1                               | 46.8                       | Grav/cal            | 2    |
| 15    | Hexane          | 300   | 11.5                               | 46.8                       | Grav/cal            | 1    |
| 16    | Heptane         | 30    | 10.4                               | 51.5                       | IGC                 | 3    |
| 17    | Heptane         | 13    | 9.4                                | 51.5                       | IGC                 | 3    |
| 18    | Heptane         | 3     | 9.0                                | 51.5                       | Grav/cal            | 2    |
| 19    | Octane          | 30    | 11.1                               | 56.2                       | IGC                 | 3    |
| 20    | Octane          | 13    | 10.0                               | 56.2                       | IGC                 | 3    |
| 21    | Octane          | 3     | 9.5                                | 56.2                       | IGC                 | 3    |
| 22    | Octane          | 300   | 11.5                               | 56.2                       | Grav/cal            | 1    |
| 23    | Nonane          | 30    | 11.8                               | 60.9                       | IGC                 | 3    |
| 24    | Nonane          | 13    | 10.4                               | 60.9                       | IGC                 | 3    |
| 25    | Nonane          | 3     | 10.0                               | 60.9                       | IGC                 | 3    |

a – adsorption entropies were measured using a combination of gravimetry and calorimetry (grav/cal), inverse gas chromatography (IGC), volumetric uptake and FT-IR.

**Table S1-B. Gas phase entropy and adsorption entropy of hydrocarbons in TON**

| Entry | Adsorbate       | Si/Al | $-\Delta S_{\text{ads}}^{\circ}/R$ | $S_{\text{gas}}^{\circ}/R$ | method <sup>a</sup> | ref. |
|-------|-----------------|-------|------------------------------------|----------------------------|---------------------|------|
| 1     | Propane         | 54    | 12.5                               | 32.5                       | Grav/cal            | 4    |
| 2     | Butane          | 54    | 14.9                               | 37.3                       | Grav/cal            | 4    |
| 3     | 2-methylpropane | 54    | 11.9                               | 30.0                       | Grav/cal            | 4    |
| 4     | Pentane         | 30    | 13.4                               | 41.8                       | IGC                 | 5    |
| 5     | Pentane         | 54    | 16.8                               | 41.8                       | Grav/cal            | 4    |
| 6     | 2-methylbutane  | 54    | 14.3                               | 41.4                       | Grav/cal            | 4    |
| 7     | Hexane          | 30    | 15.3                               | 46.8                       | IGC                 | 5    |
| 8     | Hexane          | 54    | 18.7                               | 46.8                       | Grav/cal            | 4    |
| 9     | Heptane         | 30    | 17.3                               | 51.5                       | IGC                 | 5    |
| 10    | Octane          | 30    | 19.1                               | 56.2                       | IGC                 | 5    |
| 11    | Nonane          | 30    | 20.6                               | 60.9                       | IGC                 | 5    |

a – adsorption entropies were measured using a combination of gravimetry and calorimetry (grav/cal), inverse gas chromatography (IGC), volumetric uptake and FT-IR.

**Table S1-C. Gas phase entropy and adsorption entropy of hydrocarbons in MFI**

| Entry | Adsorbate           | Si/Al | $-\Delta S_{\text{ads}}^{\circ}/R$ | $S_{\text{gas}}^{\circ}/R$ | method <sup>a</sup> | ref. |
|-------|---------------------|-------|------------------------------------|----------------------------|---------------------|------|
| 1     | Propane             | 20    | 10.7                               | 32.5                       | FT-IR               | 6    |
| 2     | Propane             | 29    | 10.9                               | 32.5                       | FT-IR               | 6    |
| 3     | Propane             | 75    | 11.4                               | 32.5                       | FT-IR               | 6    |
| 4     | Propane             | 35    | 12.3                               | 32.5                       | Grav/Cal            | 7    |
| 5     | Propane             | 35    | 11.3                               | 32.5                       | Grav/Cal            | 3    |
| 6     | Butane              | 29    | 12.6                               | 37.3                       | FT-IR               | 6    |
| 7     | Butane              | 35    | 14.3                               | 37.3                       | Grav/cal            | 7    |
| 8     | Butane              | 35    | 12.5                               | 37.3                       | Grav/cal            | 3    |
| 9     | Pentane             | 20    | 14.2                               | 41.8                       | FT-IR               | 6    |
| 10    | Pentane             | 29    | 14.3                               | 41.8                       | FT-IR               | 6    |
| 11    | Pentane             | 75    | 14.4                               | 41.8                       | FT-IR               | 6    |
| 12    | Pentane             | 35    | 16.2                               | 41.8                       | Grav/Cal            | 7    |
| 13    | Pentane             | 35    | 14.2                               | 41.8                       | Grav/Cal            | 3    |
| 14    | Pentane             | 137   | 13.1                               | 41.8                       | IGC                 | 3    |
| 15    | 2-methylbutane      | 137   | 14.4                               | 41.3                       | IGC                 | 8    |
| 16    | Hexane              | 20    | 17.4                               | 46.8                       | FT-IR               | 6    |
| 17    | Hexane              | 29    | 16.6                               | 46.8                       | FT-IR               | 6    |
| 18    | Hexane              | 75    | 17.6                               | 46.8                       | FT-IR               | 6    |
| 19    | Hexane              | 35    | 18.3                               | 46.8                       | Grav/Cal            | 7    |
| 20    | Hexane              | 35    | 14.6                               | 46.8                       | Grav/Cal            | 3    |
| 21    | Hexane              | 137   | 14.7                               | 46.8                       | IGC                 | 3    |
| 22    | Hexane              | 137   | 16.0                               | 46.8                       | IGC                 | 8    |
| 23    | 2-methylpentane     | 137   | 16.1                               | 45.8                       | IGC                 | 8    |
| 24    | 3-methylpentane     | 137   | 16.1                               | 46.1                       | IGC                 | 8    |
| 25    | 2,2-dimethylbutane  | 137   | 16.1                               | 43.1                       | IGC                 | 8    |
| 26    | 2,3-dimethylbutane  | 137   | 16.0                               | 44.0                       | IGC                 | 8    |
| 27    | Heptane             | 20    | 19.4                               | 51.5                       | FT-IR               | 6    |
| 28    | Heptane             | 29    | 20.9                               | 51.5                       | FT-IR               | 6    |
| 29    | Heptane             | 75    | 20.3                               | 51.5                       | FT-IR               | 6    |
| 30    | Heptane             | 137   | 16.2                               | 51.5                       | IGC                 | 3    |
| 31    | Heptane             | 137   | 17.6                               | 51.5                       | IGC                 | 8    |
| 32    | 2-methylhexane      | 137   | 17.9                               | 50.5                       | IGC                 | 8    |
| 33    | 3-methylhexane      | 137   | 17.9                               | 51.2                       | IGC                 | 8    |
| 34    | 2,3 dimethylpentane | 137   | 18.0                               | 49.8                       | IGC                 | 8    |
| 35    | Octane              | 137   | 17.8                               | 56.2                       | IGC                 | 3    |
| 36    | Octane              | 137   | 19.3                               | 56.2                       | IGC                 | 8    |
| 37    | 2-methylheptane     | 137   | 19.4                               | 55.3                       | IGC                 | 8    |
| 38    | 3-methylheptane     | 137   | 19.5                               | 56.0                       | IGC                 | 8    |
| 39    | 4-methylheptane     | 137   | 19.5                               | 55.0                       | IGC                 | 8    |

a – adsorption entropies were measured using a combination of gravimetry and calorimetry (grav/cal), inverse gas chromatography (IGC), volumetric uptake and FT-IR.

**Table S1-D. Gas phase entropy and adsorption entropy of hydrocarbons in FER**

| Entry | Adsorbate | Si/Al | $-\Delta S_{\text{ads}}^{\circ}/R$ | $S_{\text{gas}}^{\circ}/R$ | method <sup>a</sup> | ref. |
|-------|-----------|-------|------------------------------------|----------------------------|---------------------|------|
| 1     | Propane   | 30    | 12.3                               | 32.5                       | Grav/cal            | 4    |
| 2     | Butane    | 30    | 15.8                               | 37.3                       | Grav/cal            | 4    |
| 3     | Pentane   | 30    | 17.6                               | 41.8                       | Grav/cal            | 4    |
| 4     | Hexane    | 30    | 18.8                               | 46.8                       | Grav/cal            | 4    |

a – adsorption entropies were measured using a combination of gravimetry and calorimetry (grav/cal), inverse gas chromatography (IGC), volumetric uptake and FT-IR.

**Table S1-E. Gas phase entropy and adsorption entropy of hydrocarbons in CHA**

| Entry | Adsorbate      | Si/Al | $-\Delta S_{\text{ads}}^{\circ}/R$ | $S_{\text{gas}}^{\circ}/R$ | method <sup>a</sup> | ref. |
|-------|----------------|-------|------------------------------------|----------------------------|---------------------|------|
| 1     | Methane        | 14    | 7.6                                | 22.4                       | Grav/cal            | 9    |
| 2     | Ethane         | 14    | 9.2                                | 27.6                       | Grav/cal            | 9    |
| 3     | Propane        | 14    | 10.5                               | 32.5                       | Grav/cal            | 9    |
| 4     | Methane        | 3     | 7.8                                | 22.4                       | Volumetric          | 10   |
| 5     | Ethane         | 3     | 8.5                                | 27.6                       | Volumetric          | 10   |
| 6     | O <sub>2</sub> | 3     | 7.3                                | 24.7                       | Volumetric          | 11   |
| 7     | N <sub>2</sub> | 3     | 9.6                                | 23.0                       | Volumetric          | 11   |
| 8     | Ne             | 3     | 6.7                                | 17.6                       | Volumetric          | 11   |
| 9     | Ar             | 3     | 7.4                                | 18.6                       | Volumetric          | 11   |
| 10    | Kr             | 3     | 7.4                                | 19.7                       | Volumetric          | 11   |
| 11    | Xe             | 3     | 7.6                                | 20.4                       | Volumetric          | 11   |

a – adsorption entropies were measured using a combination of gravimetry and calorimetry (grav/cal), inverse gas chromatography (IGC), volumetric uptake and FT-IR.

**Table S1-F. Gas phase entropy and adsorption entropy of hydrocarbons in MOR**

| Entry | Adsorbate | Si/Al | $-\Delta S_{\text{ads}}^{\circ}/R$ | $S_{\text{gas}}^{\circ}/R$ | method <sup>a</sup> | ref. |
|-------|-----------|-------|------------------------------------|----------------------------|---------------------|------|
| 1     | Propane   | 10    | 10.2                               | 32.5                       | Grav/cal            | 2    |
| 2     | Butane    | 10    | 10.7                               | 37.3                       | Grav/cal            | 2    |
| 3     | Pentane   | 5     | 10.5                               | 41.8                       | IGC                 | 3    |
| 4     | Pentane   | 10    | 11.5                               | 41.8                       | Grav/cal            | 2    |
| 5     | Hexane    | 5     | 11.2                               | 46.8                       | IGC                 | 3    |
| 6     | Hexane    | 10    | 12.5                               | 46.8                       | Grav/cal            | 2    |
| 7     | Heptane   | 5     | 12.4                               | 51.5                       | IGC                 | 3    |
| 8     | Octane    | 5     | 13.2                               | 56.2                       | IGC                 | 3    |
| 9     | Nonane    | 5     | 14.0                               | 60.9                       | IGC                 | 3    |

a – adsorption entropies were measured using a combination of gravimetry and calorimetry (grav/cal), inverse gas chromatography (IGC), volumetric uptake and FT-IR.

**Table S1-G. Gas phase entropy and adsorption entropy of hydrocarbons in KFI**

| Entry | Adsorbate | Si/Al | $-\Delta S_{\text{ads}}^{\circ}/R$ | $S_{\text{gas}}^{\circ}/R$ | method <sup>a</sup> | ref. |
|-------|-----------|-------|------------------------------------|----------------------------|---------------------|------|
| 1     | Propane   | 4     | 10.2                               | 32.5                       | Grav/cal            | 4    |
| 2     | Butane    | 4     | 12.1                               | 37.3                       | Grav/cal            | 4    |
| 3     | Pentane   | 4     | 13.2                               | 41.8                       | Grav/cal            | 4    |
| 4     | Hexane    | 4     | 13.3                               | 46.8                       | Grav/cal            | 4    |

a – adsorption entropies were measured using a combination of gravimetry and calorimetry (grav/cal), inverse gas chromatography (IGC), volumetric uptake and FT-IR.

**Table S1-H. Gas phase entropy and adsorption entropy of hydrocarbons in BEA**

| Entry | Adsorbate | Si/Al | $-\Delta S_{\text{ads}}^{\circ}/R$ | $S_{\text{gas}}^{\circ}/R$ | method <sup>a</sup> | ref. |
|-------|-----------|-------|------------------------------------|----------------------------|---------------------|------|
| 1     | Pentane   | 12    | 9.3                                | 41.8                       | IGC                 | 3    |
| 2     | Hexane    | 12    | 10.2                               | 46.8                       | IGC                 | 3    |
| 3     | Heptane   | 12    | 11.2                               | 51.5                       | IGC                 | 3    |
| 4     | Octane    | 12    | 12.1                               | 56.2                       | IGC                 | 3    |
| 5     | Nonane    | 12    | 13.2                               | 60.9                       | IGC                 | 3    |

a – adsorption entropies were measured using a combination of gravimetry and calorimetry (grav/cal), inverse gas chromatography (IGC), volumetric uptake and FT-IR.

**Table S1-I. Gas phase entropy and adsorption entropy of hydrocarbons in LTL**

| Entry | Adsorbate | Si/Al | $-\Delta S_{\text{ads}}^{\circ}/R$ | $S_{\text{gas}}^{\circ}/R$ | method <sup>a</sup> | ref. |
|-------|-----------|-------|------------------------------------|----------------------------|---------------------|------|
| 1     | Methane   | n.r.  | 8.5                                | 22.4                       | Volumetric          | 10   |
| 2     | Ethane    | n.r.  | 9.9                                | 27.6                       | Volumetric          | 10   |
| 3     | Propane   | n.r.  | 10.6                               | 32.5                       | Volumetric          | 10   |
| 4     | Butane    | n.r.  | 11.2                               | 37.3                       | Volumetric          | 10   |

a – adsorption entropies were measured using a combination of gravimetry and calorimetry (grav/cal), inverse gas chromatography (IGC), volumetric uptake and FT-IR.

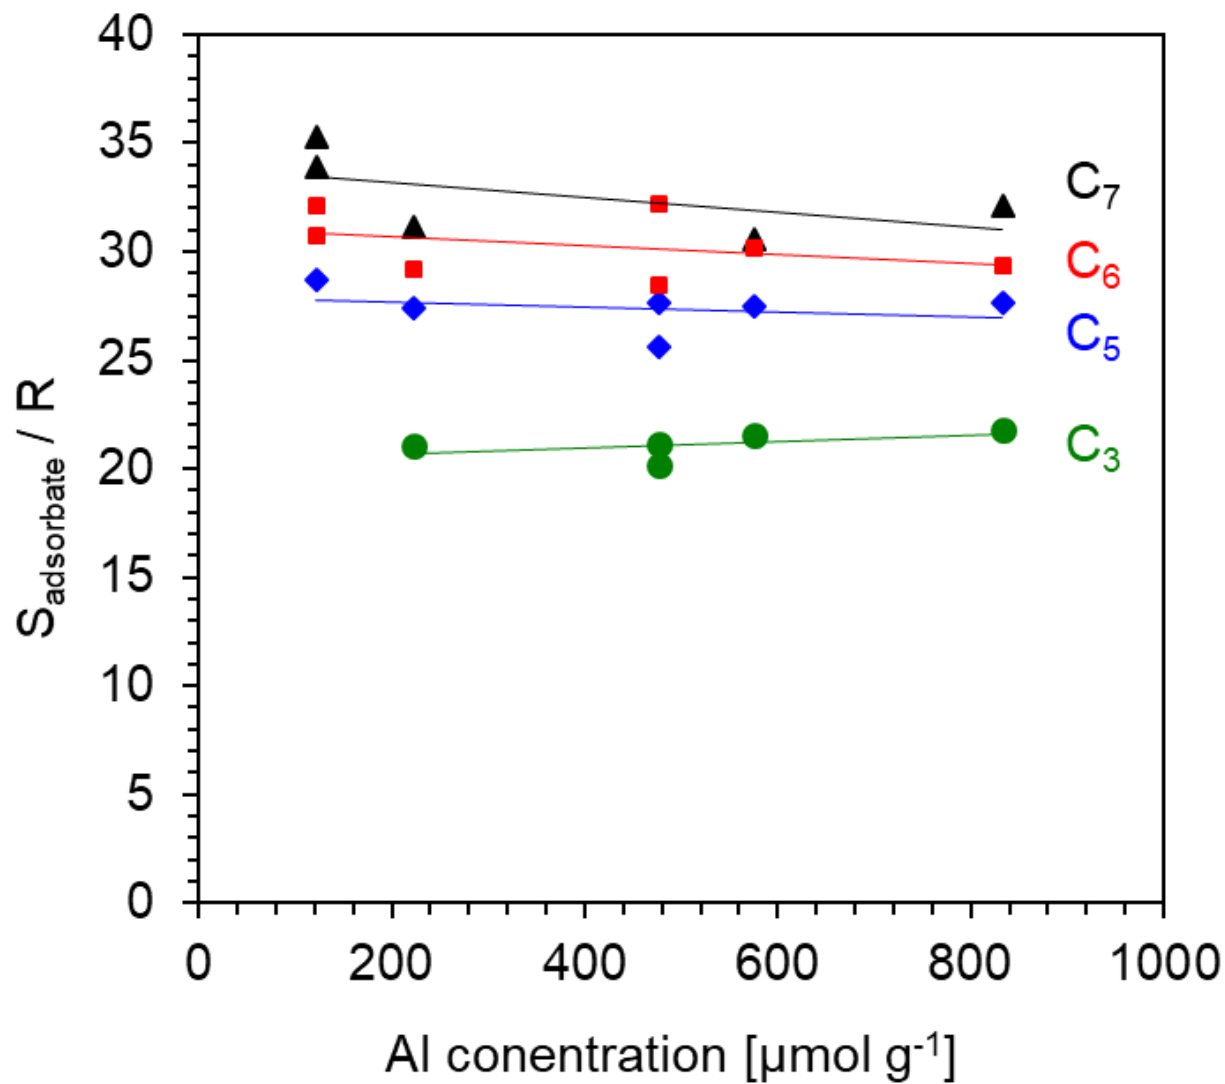

**Figure S1.** Adsorbate entropy for C3-C7 linear alkanes on MFI as a function of bulk Al concentration.

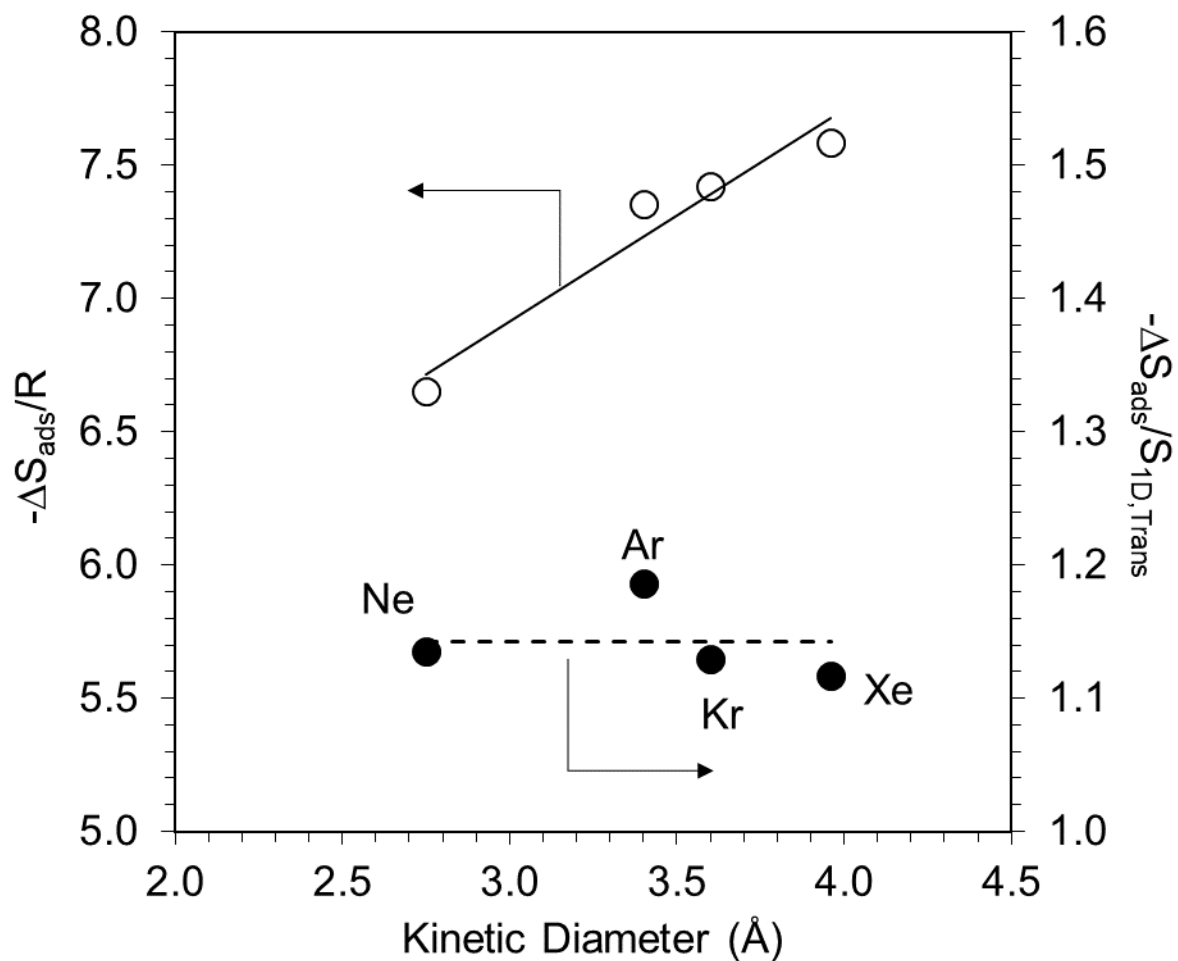

**Figure S2.** Experimentally measured entropy of adsorption (open symbols) for Ne, Ar, Kr and Xe on CHA (Si/Al = 3, Table S1-E), filled symbols indicate entropies of adsorption normalized by the entropy associated with one degree of translational freedom.

**Table S2. Translational, rotational and molecular gas phase entropy of alkanes and permanent gases.**

| Entry | Molecule            | $S_{\text{Trans}}^0/R$ | $S_{\text{Rot}}^0/R$ | $S_{\text{gas}}^0/R^a$ |
|-------|---------------------|------------------------|----------------------|------------------------|
| 1     | H <sub>2</sub>      | 14.1                   | 1.5                  | 15.7                   |
| 2     | O <sub>2</sub>      | 18.3                   | 5.3                  | 24.7                   |
| 3     | N <sub>2</sub>      | 18.1                   | 5.0                  | 23.0                   |
| 4     | Ne                  | 17.6                   | 0.0                  | 17.6                   |
| 5     | Ar                  | 18.6                   | 0.0                  | 18.6                   |
| 6     | Kr                  | 19.7                   | 0.0                  | 19.7                   |
| 7     | Xe                  | 20.4                   | 0.0                  | 20.4                   |
| 8     | Methane             | 17.2                   | 4.9                  | 22.4                   |
| 9     | Ethane              | 18.2                   | 9.0                  | 27.6                   |
| 10    | Propane             | 18.7                   | 12.6                 | 32.5                   |
| 11    | Butane              | 19.2                   | 16.5                 | 37.3                   |
| 12    | Pentane             | 19.5                   | 19.9                 | 41.8                   |
| 13    | Hexane              | 19.8                   | 23.3                 | 46.8                   |
| 14    | Heptane             | 20.0                   | 26.8                 | 51.5                   |
| 15    | Octane              | 20.2                   | 30.4                 | 56.2                   |
| 16    | Nonane              | 20.3                   | 33.9                 | 60.9                   |
| 17    | 2-methylpropane     | 19.2                   | 14.6                 | 35.4                   |
| 18    | 2-methylbutane      | 19.5                   | 19.1                 | 41.3                   |
| 19    | 2-methylpentane     | 19.8                   | 22.3                 | 45.8                   |
| 20    | 3-methylpentane     | 19.8                   | 22.5                 | 46.1                   |
| 21    | 2,2-dimethylbutane  | 19.8                   | 20.1                 | 43.1                   |
| 22    | 2,3-dimethylbutane  | 19.8                   | 20.8                 | 44.0                   |
| 23    | 2-methylhexane      | 20.0                   | 25.8                 | 50.5                   |
| 24    | 3-methylhexane      | 20.0                   | 26.4                 | 51.2                   |
| 25    | 2,3 dimethylpentane | 20.0                   | 25.2                 | 49.8                   |
| 26    | 2-methylheptane     | 20.2                   | 29.7                 | 55.3                   |
| 27    | 3-methylheptane     | 20.2                   | 30.3                 | 56.0                   |
| 28    | 4-methylheptane     | 20.2                   | 29.4                 | 55.0                   |

a – ref. S12



**Table S3. Rotational and Translational degrees of freedom lost upon adsorption in different zeolite frameworks.**

| Framework | Rotational Degrees of Freedom Lost <sup>a</sup> | Translational Degrees of Freedom Lost <sup>a</sup> | Cavity Diameter (Å) |
|-----------|-------------------------------------------------|----------------------------------------------------|---------------------|
| MFI       | 1.34                                            | 0.92                                               | 5.5                 |
| CHA       | 0.72                                            | 1.15                                               | 7.4                 |
| TON       | 0.99                                            | 1.35                                               | 5.0                 |
| FER       | 1.71                                            | 0.91                                               | 4.3                 |
| MOR       | 0.46                                            | 1.27                                               | 7.0                 |
| FAU       | 0.35                                            | 1.05                                               | 12.6                |
| BEA       | 0.8                                             | 0.6                                                | 7.5                 |
| LTL       | 0.48                                            | 1.37                                               | 9.0                 |
| KFI       | 0.77                                            | 1.17                                               | 10.7                |

a - Degrees of freedom lost were obtained through non-linear least squares regression of Eq. 7 using experimental adsorption entropy data (Table S1) and calculated rotational/translational gas phase entropies (Table S2)

**Table S4. Enthalpies and entropies of alkane adsorption in FER, TON, FAU, KFI, MFI, MOR and CHA frameworks.**

| Entry | Framework | Si/Al | Molecule   | $-\Delta H_{\text{ads}}$ (kJ mol <sup>-1</sup> ) | $-\Delta S_{\text{ads}}$ (J mol <sup>-1</sup> K <sup>-1</sup> ) | ref. |
|-------|-----------|-------|------------|--------------------------------------------------|-----------------------------------------------------------------|------|
| 1     | FER       | 30    | Propane    | 49.0                                             | 102.6                                                           | 4    |
| 2     | FER       | 30    | Butane     | 59.0                                             | 131.2                                                           | 4    |
| 3     | FER       | 30    | Pentane    | 69.0                                             | 146.6                                                           | 4    |
| 4     | FER       | 30    | Hexane     | 79.0                                             | 156.2                                                           | 4    |
| 5     | TON       | 52    | Propane    | 49.0                                             | 103.8                                                           | 4    |
| 6     | TON       | 52    | Butane     | 60.0                                             | 124.2                                                           | 4    |
| 7     | TON       | 52    | Pentane    | 71.0                                             | 140.1                                                           | 4    |
| 8     | TON       | 52    | Hexane     | 81.5                                             | 155.4                                                           | 4    |
| 9     | TON       | 52    | Isobutane  | 47.5                                             | 99.0                                                            | 4    |
| 10    | TON       | 52    | Isopentane | 59.0                                             | 118.9                                                           | 4    |
| 11    | FAU       | 300   | Propane    | 27.0                                             | 47.7                                                            | 1    |
| 12    | FAU       | 300   | Butane     | 34.0                                             | 67.6                                                            | 1    |
| 13    | FAU       | 300   | Pentane    | 41.0                                             | 89.4                                                            | 1    |
| 14    | FAU       | 300   | hexane     | 47.0                                             | 95.6                                                            | 1    |
| 15    | FAU       | 300   | Octane     | 61.0                                             | 95.9                                                            | 1    |
| 16    | FAU       | 300   | Isobutane  | 33.0                                             | 63.5                                                            | 1    |
| 17    | FAU       | 300   | Isopentane | 39.0                                             | 83.5                                                            | 1    |
| 18    | FAU       | 3     | Butane     | 39.0                                             | 82.0                                                            | 2    |
| 19    | FAU       | 3     | Pentane    | 46.0                                             | 87.0                                                            | 2    |
| 20    | FAU       | 3     | Hexane     | 53.0                                             | 92.0                                                            | 2    |
| 21    | KFI       | 4     | Propane    | 47.0                                             | 85.0                                                            | 4    |
| 22    | KFI       | 4     | Butane     | 52.0                                             | 100.5                                                           | 4    |
| 23    | KFI       | 4     | Pentane    | 57.0                                             | 109.5                                                           | 4    |
| 24    | KFI       | 4     | Hexane     | 60.0                                             | 110.9                                                           | 4    |
| 25    | MFI       | 35    | Propane    | 41.0                                             | 94.0                                                            | 3    |
| 26    | MFI       | 35    | Butane     | 52.0                                             | 104.0                                                           | 3    |
| 27    | MFI       | 35    | Pentane    | 62.5                                             | 118.0                                                           | 3    |
| 28    | MFI       | 35    | Hexane     | 72.0                                             | 121.0                                                           | 3    |
| 29    | MFI       | 35    | Propane    | 46.0                                             | 102.0                                                           | 2    |
| 30    | MFI       | 35    | Butane     | 58.0                                             | 119.0                                                           | 2    |
| 31    | MFI       | 35    | Pentane    | 70.0                                             | 135.0                                                           | 2    |
| 32    | MFI       | 35    | Hexane     | 82.0                                             | 152.0                                                           | 2    |
| 33    | MOR       | 10    | Propane    | 41.0                                             | 85.0                                                            | 2    |
| 34    | MOR       | 10    | Butane     | 50.0                                             | 89.0                                                            | 2    |
| 35    | MOR       | 10    | Pentane    | 59.0                                             | 96.0                                                            | 2    |
| 36    | MOR       | 10    | Hexane     | 69.0                                             | 104.0                                                           | 2    |
| 37    | CHA       | 14    | Methane    | 17.0                                             | 63.5                                                            | 9    |
| 38    | CHA       | 14    | Ethane     | 27.5                                             | 76.1                                                            | 9    |
| 39    | CHA       | 14    | Propane    | 37.6                                             | 87.7                                                            | 9    |

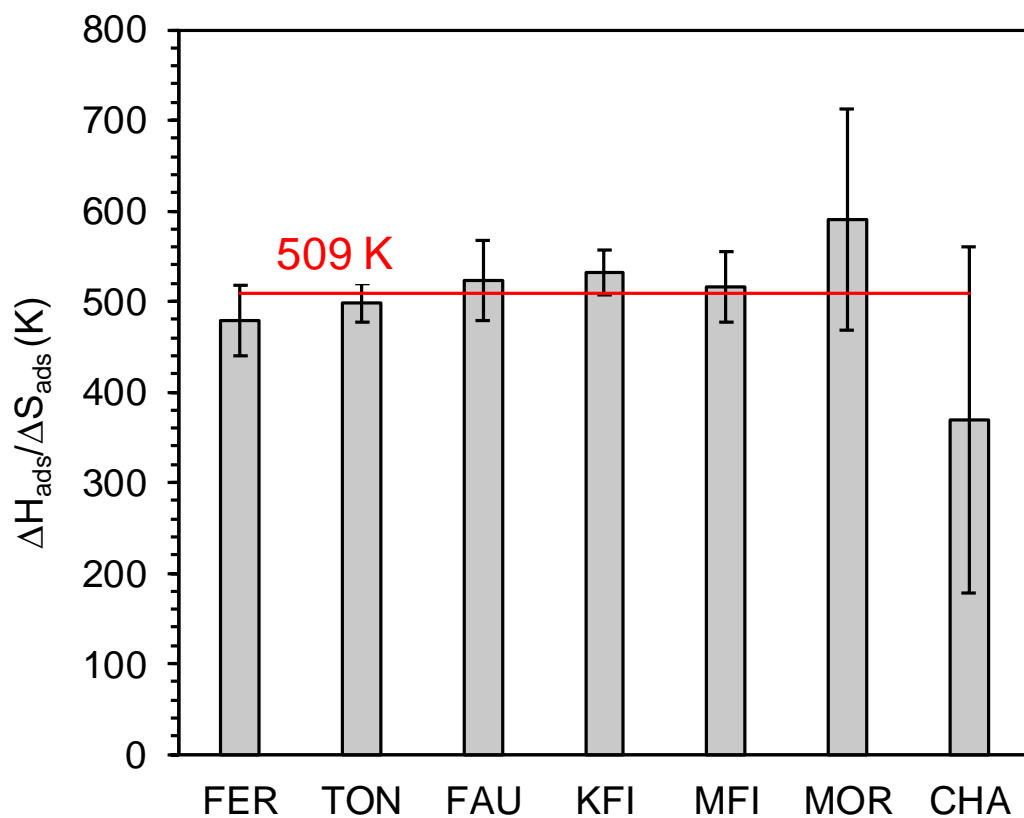

**Figure S3.** Ratio of the enthalpy-to-entropy of adsorption of the seven frameworks depicted in Figure 6A. Error bars represent a 95% confidence interval.

As per transition state theory, the desorption pre-exponential factor can be defined based on the ratio of the partition function of the transition and adsorbed state,

$$v_{\text{des}} = \frac{k_b T}{h} \frac{Q_{\text{TS}}}{Q_{\text{ads}}} \quad (\text{S1})$$

Recasting this in terms of entropy, the desorption pre-exponential factor can be defined as,

$$v_{\text{des}} = \frac{k_b T}{h} e^{\frac{\Delta S_{\text{TS,des}}}{R}} \quad (\text{S2})$$

The change in entropy associated with approaching the transition state of desorption starting from the adsorbed state is,

$$\Delta S_{\text{TS,des}} = S_{\text{TS,des}} - S_{\text{ads}} \quad (\text{S3})$$

Each of the entropies of the transition state for desorption and the adsorbed state can be related to known quantities.

$$S_{\text{TS,des}} = S_{\text{gas}} - S_{\text{1D,Trans}} \quad (\text{S4})$$

$$S_{\text{ads}} = S_{\text{gas}} + \Delta S_{\text{ads}} \quad (\text{S5})$$

Combining Eq. S5 and Eq. 8 of the main text,

$$S_{\text{ads}} = S_{\text{gas}} - S_{\text{1D,Trans}} - F_{\text{rot}} S_{\text{rot}} \quad (\text{S6})$$

Combining Eq. S3-S6, the change in entropy associated with approaching the transition state of desorption starting from the adsorbed state is,

$$\Delta S_{\text{TS,des}} = (S_{\text{gas}} - S_{\text{1D,Trans}}) - (S_{\text{gas}} - S_{\text{1D,Trans}} - F_{\text{rot}} S_{\text{rot}}) \quad (\text{S7})$$

$$\Delta S_{\text{TS,des}} = F_{\text{rot}} S_{\text{rot}} \quad (\text{S8})$$

Inserting Eq. S8 into S2, the desorption pre-exponential factor is defined in terms of the losses in rotational entropy due to confinement,

$$v_{\text{des}} = \frac{k_b T}{h} e^{\frac{F_{\text{rot}} S_{\text{rot}}}{R}} \quad (\text{S9})$$

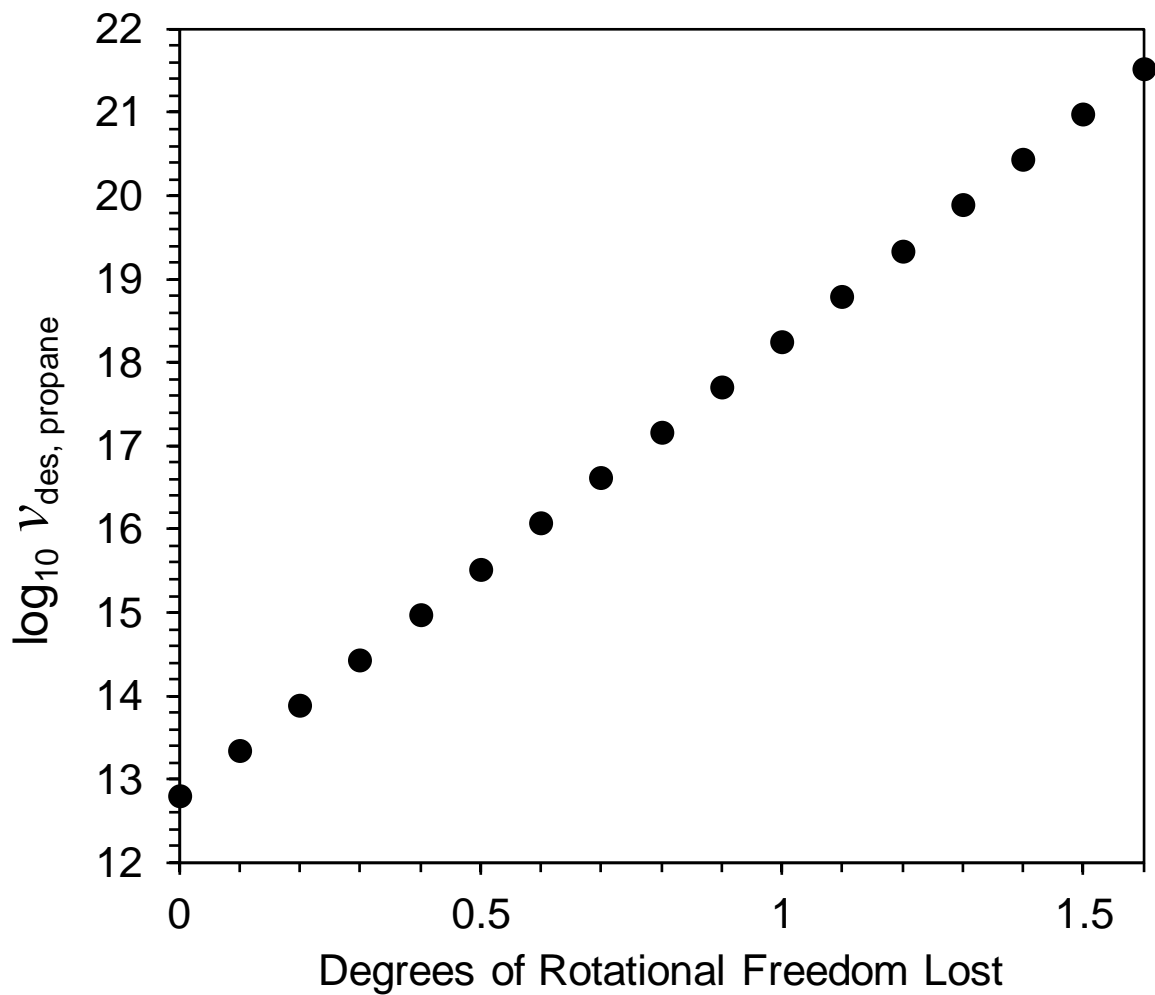

**Figure S4.** Relationship between the desorption pre-exponential factor of propane ( $v_{\text{des,propane}}$ ) and the degrees of rotational freedom lost upon adsorption as per Eq. (S9).

## References

- (1) Eder, F.; Lercher, J. A. Alkane sorption in molecular sieves: The contribution of ordering, intermolecular interactions, and sorption on brønsted acid sites. *Zeolites* **1997**, *18* (1), 75-81.
- (2) Eder, F.; Stockenhuber, M.; Lercher, J. A. Brønsted acid site and pore controlled siting of alkane sorption in acidic molecular sieves. *The Journal of Physical Chemistry B* **1997**, *101* (27), 5414-5419.
- (3) De Moor, B. A.; Reyniers, M.-F.; Gobin, O. C.; Lercher, J. A.; Marin, G. B. Adsorption of c2–c8 n-alkanes in zeolites. *The Journal of Physical Chemistry C* **2011**, *115* (4), 1204-1219.
- (4) Eder, F.; Lercher, J. A. On the role of the pore size and tortuosity for sorption of alkanes in molecular sieves. *The Journal of Physical Chemistry B* **1997**, *101* (8), 1273-1278.
- (5) Denayer, J. F.; Baron, G. V.; Martens, J. A.; Jacobs, P. A. Chromatographic study of adsorption of n-alkanes on zeolites at high temperatures. *The Journal of Physical Chemistry B* **1998**, *102* (17), 3077-3081.
- (6) Li, H.; Kadam, S. A.; Vimont, A.; Wormsbecher, R. F.; Travert, A. Monomolecular cracking rates of light alkanes over zeolites determined by ir operando spectroscopy. *ACS Catalysis* **2016**, *6* (7), 4536-4548.
- (7) Bhan, A.; Gounder, R.; Macht, J.; Iglesia, E. Entropy considerations in monomolecular cracking of alkanes on acidic zeolites. *Journal of Catalysis* **2008**, *253* (1), 221-224.
- (8) Denayer, J. F.; Souverijns, W.; Jacobs, P. A.; Martens, J. A.; Baron, G. V. High-temperature low-pressure adsorption of branched c5–c8 alkanes on zeolite beta, zsm-5, zsm-22, zeolite y, and mordenite. *The Journal of Physical Chemistry B* **1998**, *102* (23), 4588-4597.
- (9) Piccini, G.; Alessio, M.; Sauer, J.; Zhi, Y.; Liu, Y.; Kolvenbach, R.; Jentys, A.; Lercher, J. A. Accurate adsorption thermodynamics of small alkanes in zeolites. Ab initio theory and experiment for h-chabazite. *The Journal of Physical Chemistry C* **2015**, *119* (11), 6128-6137.
- (10) R. M. Barrer, J. A. D. Sorption in decationated zeolites ii. Simple paraffins in h-forms of chabazite and zeolite l. *Proceedings of the Royal Society of London. A. Mathematical and Physical Sciences* **1971**, *322* (1548), 1-19.
- (11) R. M. Barrer, F. R. S., J. A. Davies. Sorption in decationated zeolites. I. Gases in hydrogen-chabazite. *Proceedings of the Royal Society of London. A. Mathematical and Physical Sciences* **1970**, *320* (1542), 289-308.
- (12) Scott, D. W.; Mines, U. S. B. o., Ed.; Bartlesville Energy Research Center: Bartlesville, Oklahoma, 1974.
